# Supplementary material for: Tissue expansion of ‘cleared’ whole brains reduces contrast in ex vivo MRI
Source: Research Square preprint supplement (doi:10.21203/rs.3.rs-877945/v1), 2021-09-14
Supplement: Supplementary file 1 [file 2e891a136a06f36a3012cf98.xlsx]

## Sheet: Sheet1
	deformation	hydration	MRI contrast	ORO cryosection lipid staining	DiI cryosection staining	DiI washout assay for lipid level estimation	Raman spetroscopy for lipid quantification	MS lipidomics
uDISCO	shrinkage	no	yes, after hydration	no	not for lipid quantitation, but for tissue integrity estimation	yes	partial, after wash	yes
ECi	shrinkage	no	yes, after hydration	no		yes	partial, after wash	yes
CLARITY	expansion	yes	no	yes		yes	no	yes
ETC/SDS	expansion	yes	partial, gradually reduces	yes	N/A	N/A	N/A	N/A
Scale	expansion	yes	no	N/A	N/A	yes	yes	yes
